# Why Do Women Not Use Antenatal Services in Low- and Middle-Income Countries? A Meta-Synthesis of Qualitative Studies

Kenneth Finlayson, Soo Downe\*

Research into Childbirth and Health Unit, School of Health, University of Central Lancashire, Preston, United Kingdom

## Abstract

**Background:** Almost 50% of women in low- and middle-income countries (LMICs) don't receive adequate antenatal care. Women's views can offer important insights into this problem. Qualitative studies exploring inadequate use of antenatal services have been undertaken in a range of countries, but the findings are not easily transferable. We aimed to inform the development of future antenatal care programmes through a synthesis of findings in all relevant qualitative studies.

**Methods and Findings:** Using a predetermined search strategy, we identified robust qualitative studies reporting on the views and experiences of women in LMICs who received inadequate antenatal care. We used meta-ethnographic techniques to generate themes and a line-of-argument synthesis. We derived policy-relevant hypotheses from the findings. We included 21 papers representing the views of more than 1,230 women from 15 countries. Three key themes were identified: "pregnancy as socially risky and physiologically healthy", "resource use and survival in conditions of extreme poverty", and "not getting it right the first time". The line-of-argument synthesis describes a dissonance between programme design and cultural contexts that may restrict access and discourage return visits. We hypothesize that centralised, risk-focused antenatal care programmes may be at odds with the resources, beliefs, and experiences of pregnant women who underuse antenatal services.

**Conclusions:** Our findings suggest that there may be a misalignment between current antenatal care provision and the social and cultural context of some women in LMICs. Antenatal care provision that is theoretically and contextually at odds with local contextual beliefs and experiences is likely to be underused, especially when attendance generates increased personal risks of lost family resources or physical danger during travel, when the promised care is not delivered because of resource constraints, and when women experience covert or overt abuse in care settings.

Please see later in the article for the Editors' Summary.

**Citation:** Finlayson K, Downe S (2013) Why Do Women Not Use Antenatal Services in Low- and Middle-Income Countries? A Meta-Synthesis of Qualitative Studies. *PLoS Med* 10(1): e1001373. doi:10.1371/journal.pmed.1001373

**Academic Editor:** Karen Daniels, South African Medical Research Council, South Africa

**Received:** March 19, 2012; **Accepted:** December 5, 2012; **Published:** January 22, 2013

**Copyright:** © 2013 Finlayson, Downe. This is an open-access article distributed under the terms of the Creative Commons Attribution License, which permits unrestricted use, distribution, and reproduction in any medium, provided the original author and source are credited.

**Funding:** No direct funding was received for this study. The authors were personally salaried by their institutions during the period of writing (though no specific salary was set aside or given for the writing of this paper).

**Competing Interests:** The authors have declared that no competing interests exist.

**Abbreviations:** LMIC, low- and middle-income country; MDG 5, Millennium Development Goal 5; MMR, maternal mortality ratio; WHO, World Health Organization

\* E-mail: sdowne@uclan.ac.uk

## Introduction

Recent estimates of global maternal mortality ratios (MMRs) suggest a substantial decline in recent years [1,2]. However, current rates of decline will still fall well short of meeting Millennium Development Goal 5 (MDG 5): reducing maternal mortality by 75% by 2015 [3]. Data from the World Health Organization (WHO) indicate that in many low- and middle-income countries (LMICs), especially in sub-Saharan Africa, the rate of decline in MMR is less than 1% per year, and in some countries (e.g., South Africa, Nigeria, Mozambique, and Swaziland) rates even appear to be increasing [1,4]. This slow rate of progress is starkly highlighted in the most recent "Countdown to 2015" report, which found that only nine of the 74 countries with the highest MMRs in the world were on target to achieve MDG 5 [5].

WHO reports and experts in the field consistently highlight the lack of access to local, adequately resourced health care facilities as an important reason for the relatively slow rate of progress towards achieving MDG 5 [6,7]. Access includes ensuring comprehensive antenatal care coverage for all pregnant women. Recent estimates indicate that the number of women in LMICs attending at least one antenatal appointment increased from 64% in 1990 to 81% in 2009, and those attending four or more times rose from 35% to 51% over the same period [2]. However, major disparities exist within and between continents, between countries, and between urban and rural populations [8]. As with the MMR figures, the rate of progress is slowest in sub-Saharan Africa, where antenatal coverage rates have improved slightly during the last two decades, but the number of women visiting four or more times has remained static, at about 44% [2].

Although the correlation between “inadequate” antenatal care and high maternal mortality is complicated and contentious, it is widely accepted that antenatal care presents opportunities to identify pregnancy risks and, in a broader sense, to monitor and support the general health care of women who may be susceptible to a range of potentially fatal pathologies including HIV, anaemia, malnutrition, tuberculosis, and malaria [5–9].

Global implementation of strategies designed to encourage antenatal attendance tend to be based on the assumption that if high-quality services are provided, people will come to them. However, data from quantitative population-level studies suggest that this is not necessarily the case for some groups of pregnant women. Well-documented socio-demographic data indicate that women from relatively poor backgrounds, living in rural areas, and/or with low levels of education are less likely to access antenatal services, even if they are provided [10–12]. Other factors, including having a husband with a low level of education, living a long distance from a clinic, and having high parity, have also been identified as barriers [13–17]. Similar factors emerge in reviews of barriers to antenatal care in developed countries [18–21], which suggests that the issues for women who remain marginalised at local, national, and global levels are much the same.

Based on the results of a WHO antenatal care randomised trial [22], the standard measure of adequate antenatal care delivery is a minimum of four antenatal visits (with the first occurring during the first trimester) for a woman and her foetus, if they are judged to be healthy following a standard risk assessment [23]. Although some authorities, e.g., the US Agency for International Development, have noted the need for woman-centred, individualised, culturally specific programmes [24], the recent *BMJ* Best Practice guidance on routine antenatal care provision lists a wide range of routine screening, testing, and health education topics, with little emphasis on individual concerns and circumstances [25]. Evidence equating risk-focused, low-frequency antenatal care with clinical outcomes in LMICs is limited, but a recent Cochrane review found that population groups in LMICs receiving fewer antenatal visits (4–6) had an increased risk of perinatal mortality and, in particular, stillbirth [26]. The author of a WHO commentary on this review hypothesizes that the excess perinatal loss for women in LMIC settings may be due to inadequate local tailoring of risk assessment, low numbers of staff, and inadequate training [27]. The WHO manual on antenatal care [23] does not specify how antenatal care should be funded, the nature and relevance of staff attitude and training, or what resources should be available at which level of care provision. However, tacit assumptions are likely to include that staff are available and have high levels of communication and interpersonal skills, and that the programme is affordable, otherwise it would be unlikely to function. Despite the findings of the review, and speculation about the components and the effectiveness of the WHO programme, it remains the standard for adequate antenatal care provision.

Given the potential significance of context in mediating whether women access antenatal care, qualitative studies may provide fresh insights into pertinent issues in specific settings. In terms of LMICs, such studies suggest that some women do not attend antenatal facilities because of deeply held cultural beliefs and/or tribal traditions surrounding the nature of pregnancy and childbirth [28,29]. Qualitative studies can also illuminate the effect of local policies and incentives, such as the use of antenatal clinic cards to guarantee intra-partum hospital access—a controversial practice in a number of African countries because of the potential for discrimination against women who don’t have any record of antenatal clinic attendance [30]. However, because of

the highly contextualised nature of individual qualitative studies, policy makers often overlook them, and their findings remain outside of global, national, and local health care strategies [31]. Systematic review and synthesis of qualitative studies can generate hypotheses about how successful programmes work, and why unsuccessful programmes fail certain individuals and groups [32]. To address the latter question with regards to inadequate accessing of antenatal care, we planned to locate, analyse, and synthesise qualitative studies exploring the views, beliefs, and experiences of women from LMICs who did not access antenatal care at all, or accessed it inadequately, according to the WHO definition given above. The intention was to develop hypotheses about lack of attendance that could inform policy development, based on a new understanding of why some women still don’t access antenatal care, even when it is made available.

### Qualitative Meta-Synthesis Methodology

The emphasis in meta-synthesis is on rigorous study selection and the careful interpretation of data across studies, contexts, and populations. This combination and interpretation of findings from a number of systematically selected studies in a particular subject area shares methodological similarities with its quantitative equivalent, meta-analysis. When meta-synthesis is used to explain or interpret existing knowledge, e.g., alongside meta-analysis, it can be aggregative and deductive [32]. However, when it is exploring fields where there is little prior information, it is undertaken as an inductive method, designed to generate theoretical insights and hypotheses that can be tested in future research [32]. In the latter case, the classic approach is meta-ethnography [33]. As with qualitative research, the direct findings of meta-synthesis are not usually generalisable, but the theoretical insights or hypotheses arising from the synthesis of the included studies should be transferable to other similar settings and contexts [34–36]. In meta-synthesis, as in grounded theory, the comprehensiveness of the analysis is determined by the concept of theoretical saturation. Theoretical saturation is reached when new studies do not change the emerging theory or hypothesis, and when a systematic search for disconfirming cases in all the included studies reinforces the theoretical insights. Given the scope and rigour of meta-synthesis reviews, there is greater potential for them to inform practice, influence policy, and underpin strategy than for individual qualitative studies [37,38].

## Methods

### Search Strategy and Selection Criteria

The search strategy was designed to locate qualitative studies exploring the antenatal care experiences, attitudes, and/or beliefs of women from LMICs who had chosen to access antenatal care late (after 12 wk gestation), infrequently (less than four times), or not at all [7]. We searched for any studies that might include qualitative data, including survey-based studies with open-ended written responses, mixed methods studies, focus groups, and one-to-one interviews. No language restriction was imposed. All electronic searches used keywords covering the main search domains including “antenatal”, “prenatal”, “maternity”, “pregnancy”, “care”, “service”, “provision”, “access”, and “attendance”. The searches were conducted across a range of medical, sociological, and psychological databases (MEDLINE, Embase, PubMed, AMED [Allied and Complementary Medicine Database], BNI [British Nursing Index], CINAHL [Cumulative Index to Nursing and Allied Health Literature], PsycINFO, Wilson Social Science Abstracts), as well as continent-specific databases such as Latindex (Literatura Latino-Americana e do Caribe em

Ciências da Saúde) for South American publications and AJOL (African Journals Online) for articles published in Africa. Where possible, we sought to narrow the search to LMICs by incorporating the World Bank's list of low- and middle-income economies in the search terms [39]. Some specific papers were recommended by colleagues, and we hand-searched relevant journals in the departmental and university libraries. Other articles were obtained from reference lists published in identified studies. The initial search included papers published between 1 January 1980 and 31 March 2011. An updated search was completed on 14–15 February 2012, after which the contents pages of relevant journals were reviewed (via Zetoc) as they were published. These updated searches have provided a means to check that the thematic structure and synthesis developed in the primary analysis continue to hold true as new studies are published (“theoretical saturation”).

Both authors reviewed all of the included papers independently, and then reached a final agreement on inclusion by consensus. All of the papers meeting our eligibility criteria were assessed for quality using an appropriate published tool [40]. This tool incorporates a pragmatic grading system [41] and uses an A–D scoring system. The authors determined grades by consensus, and studies scoring C+ or higher were included in the final review (see Table S1).

## Analysis and Synthesis

Our intention was to generate new theoretical insights that could form the basis for hypothesis testing in the future, so we used the meta-ethnographic approach developed by Noblit and Hare [33]. This approach has been used successfully in meta-synthesis studies related to several different health care settings [19,35,42–44]. It is not restricted to ethnographic studies, as the approach can incorporate the full range of qualitative methods. We began by identifying the findings from one paper and comparing them with the findings from another, to generate a “long list” of emerging concepts. These early concepts were then examined to identify similarities, in a process that is termed “reciprocal translation”. During this process, some concepts were collapsed together to create a parsimonious thematic structure. Each author then reviewed the themes independently to ensure there were no data that were at odds with our analysis and that no data remained unexplained. This stage of the process is analogous to searching for disconfirming data and is termed “refutational translation” in meta-ethnographic studies [33]. The themes were then synthesised into a “line of argument” synthesis—a phrase or statement that summarises the main findings of the study and the theoretical insights that they generate. This synthesis was then used to create a hypothetical model to explain why women fail to make adequate use of antenatal services in LMICs.

## Reflexive Accounting

In qualitative research, the researcher is the instrument of measurement, and the final analysis is a product of the interaction between the researcher and the data. Reflexive accounting allows the reader of the final research product to assess the degree to which the prior views and experiences of the researchers may have influenced design, data collection, and data interpretation in any specific study. In this case, S. D. believed that interpersonal relationships were likely to be critical in mediating antenatal care use, and K. F. believed that whether women accessed care was most likely to be influenced by personal and/or localised socio-economic circumstances. To minimise the effect of these beliefs, both authors were particularly rigorous in looking for refutational data in these specific areas as the analysis progressed.

## Results

Our search to 31 March 2011 generated a total of 3,622 hits, including 625 duplicates, which were removed at this stage. Of the remaining 2,997 articles, 2,892 were excluded by title and abstract because they failed to address the initial selection criteria. Most of the studies removed at this stage were excluded for one of three reasons: (1) they were conducted in high-income countries, (2) they were obviously quantitative, or (3) they were not about access to antenatal care. Of the remaining 105 papers, a further 75 were removed after independent full text review by the authors, largely because they lacked sufficient qualitative data ( $n = 36$ ), were based on the experiences of women who attended antenatal services regularly rather than those who didn't ( $n = 25$ ), reflected the views of service providers rather than the women attending care ( $n = 8$ ), or were concerned with access to health care generally as opposed to antenatal care specifically ( $n = 6$ ). This left 30 papers that were taken forward for quality assessment. Following independent review, the authors agreed that nine studies failed to meet the quality requirements, leaving 21 that were taken forward for analysis and synthesis (see Figure 1 for details of the selection process). Of the nine studies excluded, three were mixed methods studies with very limited qualitative data, two reported on the views of health care providers with little emphasis on the responses of service users, two presented qualitative information in a quantitative format (frequency of responses), and two failed to meet the quality criteria for design, methodology, and/or analysis. Only one study meeting the inclusion and quality criteria was identified by the updated searches since 31 March 2011 [45], and this was used to check the explanatory power of the final thematic structure, synthesis, and interpretation.

## Description of the Studies

The 21 papers in the final full synthesis represent the views of women from 15 countries (Bangladesh [ $\times 2$ ], Benin, Cambodia, Gambia, India, Indonesia, Kenya, Lebanon, Mexico, Mozambique, Nepal, Pakistan, South Africa [ $\times 4$ ], Tanzania [ $\times 2$ ], and Uganda [ $\times 2$ ]) and include data from more than 1,239 participants (minimum 10, maximum 240) who were either interviewed directly or gave their opinion as part of a focus group (see Table S1 for full details of the included studies). Two of the studies utilised a mixed methods approach, and although these studies contained limited qualitative information, the narrative data were pertinent and reasonably well reported. Ten of the 21 studies were conducted in a rural setting, three took place in an exclusively urban environment, and the remaining eight involved both urban and rural settings. The earliest paper was published in 1992 and the most recent in 2011, with the majority ( $n = 17$ ) being published within the last ten years. More than half of the included papers ( $n = 12$ ) were published within the last three years, which suggests an upswing in interest in this area of research (see Table 1 for a summary of included papers).

## Description of the Themes

The emerging concepts and themes are summarised in Table 2. We identified a total of seven emerging themes and three final themes (summarised below), two of which relate specifically to initial attendance at antenatal facilities, and a further, service-oriented, theme relating to maintaining attendance.

### Theme One: Pregnancy as Socially Contingent and Physiologically Healthy

This theme incorporates two concepts (highlighted below) that emphasise some of the cultural and contextual nuances associated with pregnancy. Many women in these studies described

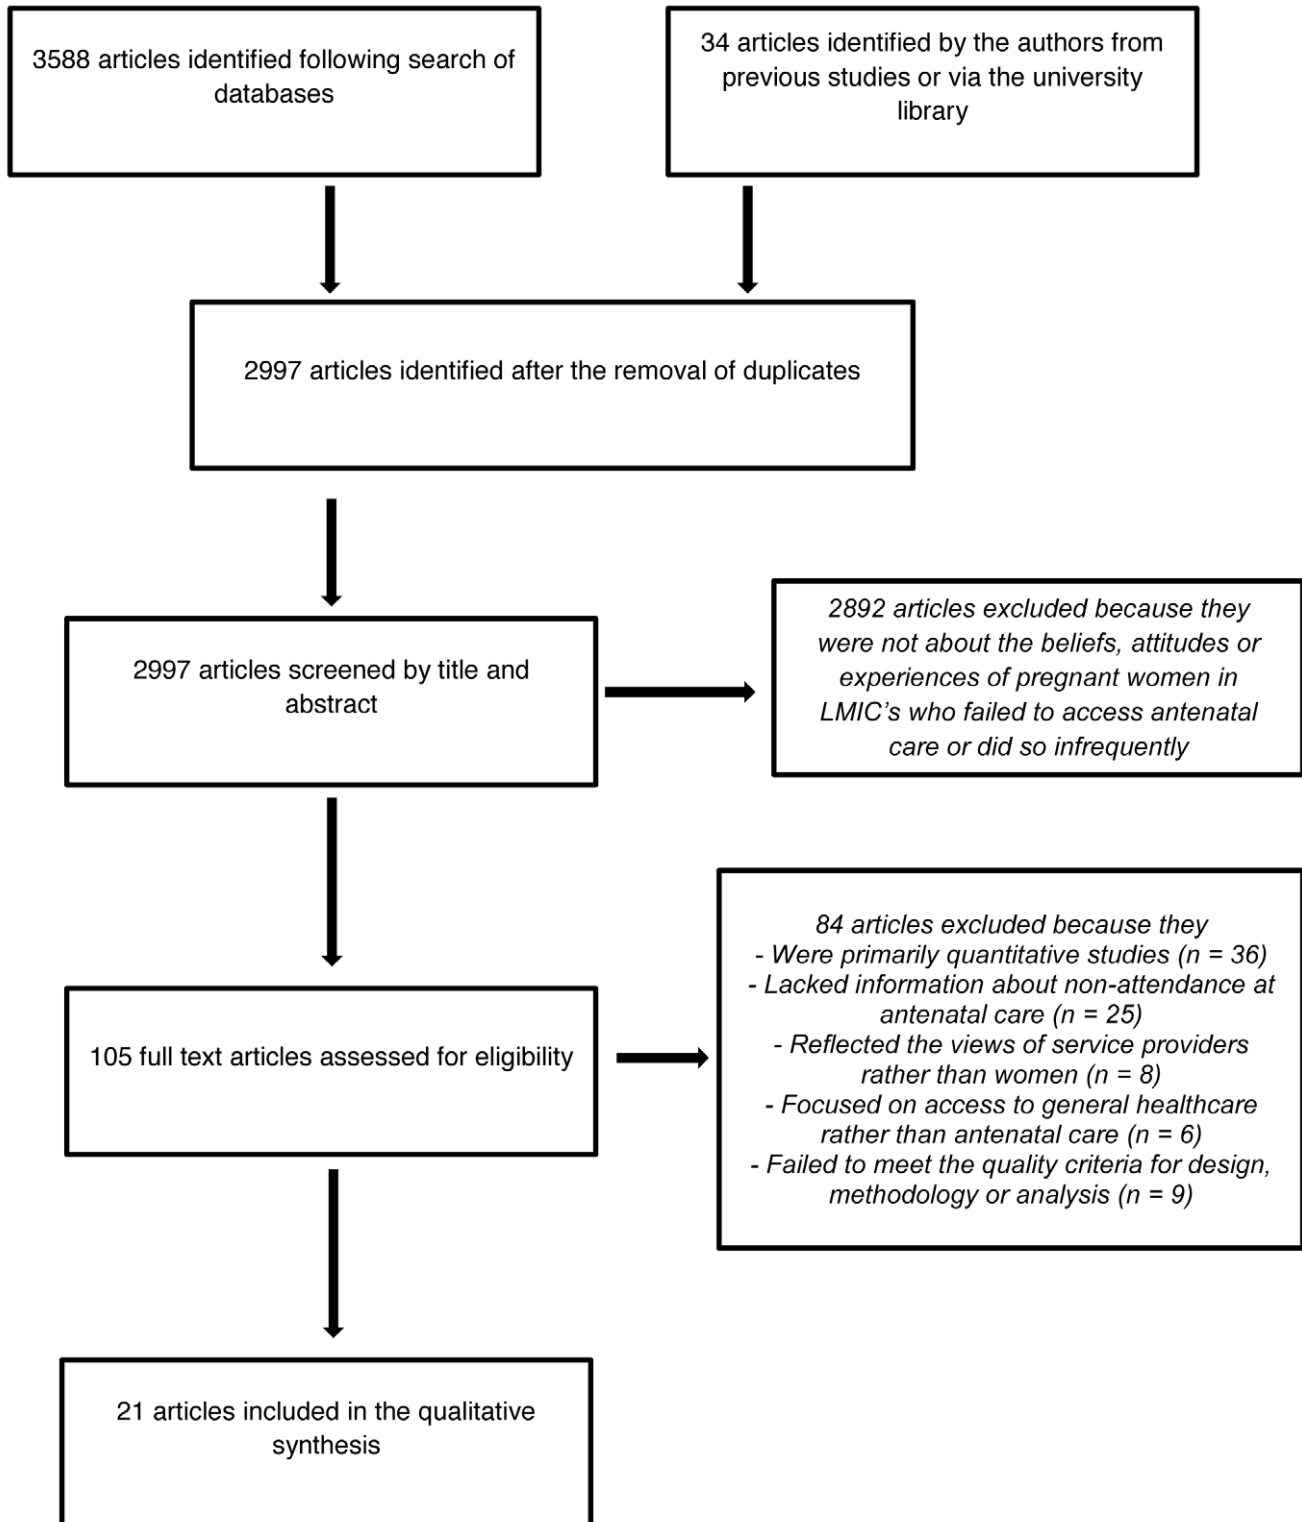

**Figure 1. Flow chart summarising search strategy.**  
doi:10.1371/journal.pmed.1001373.g001

pregnancy as a healthy physical state and saw little reason to visit health professionals when there was no perceived threat to their well-being. In some cultures this reluctance to engage with

antenatal services was further compounded by a belief that pregnancy disclosure could lead to unwanted religious or spiritual complications.

**Table 1.** Summary of included studies.

| Authors [Reference]             | Year of Publication | Country      | Location—Type of Region                                               | Number of Participants | Method Used                 | Quality Grading |
|---------------------------------|---------------------|--------------|-----------------------------------------------------------------------|------------------------|-----------------------------|-----------------|
| Abrahams et al. [46]            | 2001                | South Africa | Cape Town—semi-urban                                                  | 32                     | Interviews                  | C+              |
| Myer and Harrison [47]          | 2003                | South Africa | Hlabisa district—rural                                                | 29                     | Interviews                  | B               |
| Pretorius and Greeff [48]       | 2004                | South Africa | Mafikeng-Mmbatho districts—rural                                      | 18                     | Interviews                  | C+              |
| Mrisho et al. [49]              | 2009                | Tanzania     | Lindi and Tandahimba districts—rural                                  | 58                     | Focus groups                | B               |
| Matsuoka et al. [50]            | 2010                | Cambodia     | Kampong and Cham provinces—rural                                      | 66                     | Interviews and focus groups | B               |
| Choudhury and Ahmed [51]        | 2011                | Bangladesh   | Rangpur and Kurigram districts—rural                                  | 20                     | Interviews                  | C+              |
| Chapman [52]                    | 2003                | Mozambique   | Vila-Gondola—semi-urban                                               | 83                     | Interviews                  | A               |
| Grossmann-Kendall et al. [53]   | 2001                | Benin        | Cotonou and Ouidah districts—urban and rural                          | 19                     | Interviews                  | C+              |
| Ndyomugenyi et al. [54]         | 1998                | Uganda       | Kigoroba sub-country—rural                                            | 80–120 <sup>a</sup>    | Focus groups                | C+              |
| Gcaba and Brookes [55]          | 1992                | South Africa | Durban—urban                                                          | 10                     | Interviews                  | B               |
| Atuyambe et al. [56]            | 2009                | Uganda       | Wakiso district—rural                                                 | 92                     | Focus groups                | B               |
| Stokes et al. [57]              | 2008                | Gambia       | Kiang West district—rural                                             | 83                     | Interviews and focus groups | C+              |
| Griffiths and Stephenson [58]   | 2001                | India        | Pune and Mumbai—mix of urban and rural at each location               | 45                     | Interviews                  | B               |
| Simkhada et al. [59]            | 2010                | Nepal        | Kathmandu area—semi-urban and rural                                   | 30                     | Interviews                  | B               |
| Titaley et al. [60]             | 2010                | Indonesia    | Garut, Sukabumi, and Ciamis districts, West Java—semi-urban and rural | 119                    | Interviews and focus groups | B               |
| Family Care International [61]  | 2003                | Kenya        | Homabay and Migori districts—mix of urban and rural in each           | 27–47 <sup>a</sup>     | Interviews and focus groups | B               |
| Tinoco-Ojanguren et al. [62]    | 2008                | Mexico       | Chiapas—mix of urban and rural                                        | 16                     | Interviews                  | C+              |
| Mumtaz and Salway [63]          | 2007                | Pakistan     | Punjab—rural                                                          | 39–55 <sup>a</sup>     | Interviews and focus groups | B               |
| Chowdhury et al. [64]           | 2003                | Bangladesh   | Dhaka and Upazila—urban and rural                                     | 16                     | Interviews                  | B               |
| Mubyazi et al. [65]             | 2010                | Tanzania     | Mkuranaga and Mufinidi districts—both rural                           | 240                    | Interviews and focus groups | B+              |
| Kabakian-Khasholian et al. [66] | 2000                | Lebanon      | Bekaa, Akkar, and Beirut—rural, semi-rural, and urban                 | 117                    | Interviews                  | C+              |

<sup>a</sup>A range is given for these studies, as the authors list the number of focus groups conducted, with a minimum and maximum number of participants; e.g., ten focus groups with 8–12 participants.

doi:10.1371/journal.pmed.1001373.t001

**Pregnancy awareness and disclosure: “It’s better to wait, to see if you really are pregnant”.** For many respondents, traditional or cultural beliefs dictated that they should wait until they had missed several periods before confirming a pregnancy [46–51].

*Sometimes it’s difficult to tell that you are pregnant. Some people have irregular periods, they miss periods for months only to find they are not pregnant, so it is better to wait, to see if you are really pregnant.* [Pregnant woman, rural South Africa] [47]

This belief limited early accessing of care. Even when women suspected they were pregnant, the motivation to visit an antenatal clinic was often superseded by cultural and superstitious beliefs about pregnancy disclosure [52–63]. In rural Pakistan, the shame (*sharam*) associated with pregnancy, because of the obvious relationship with sexual activity, meant women were less willing to be seen in public places [63]. The shame of being pregnant and the subsequent reluctance to be seen in public was also a factor for pregnant teenagers in Uganda [56].

In other parts of Africa and South East Asia, the potential to be “cursed” by evil spirits or jealous or vindictive contemporaries had

a detrimental effect on pregnancy disclosure [52,53,55,64]. One South African woman who had recently experienced a neonatal death explained her loss in the following manner:

*I think my boyfriend’s previous girlfriends were jealous of my pregnancy and they bewitched me.* [55]

These kinds of beliefs appeared to be relatively common in rural communities and discouraged women from visiting public places, especially antenatal clinics, where a visit would be perceived as a public declaration of pregnancy.

**Resistance to risk-averse care models: “What is the point in going for a check-up in a healthy condition?”.** In many of the studies, women reported that they didn’t feel the need to seek professional care when there was nothing wrong with their pregnancy [46–49,52–54,58,63,64].

*As no-one expects to be sick during pregnancy, visiting the centre for a check-up is not necessary. What is the point in going for a check-up in a healthy condition?* [Non-user of antenatal care services, rural Bangladesh] [64]

**Table 2.** Summary of themes.

| Initial Concepts (Findings from Primary Papers)              | Relevant Papers (References) | Emerging Themes                                                                                                                                                                                                                                                | Final Themes                                                                                                                                                                                                                                                                                                                                                                                      |
|--------------------------------------------------------------|------------------------------|----------------------------------------------------------------------------------------------------------------------------------------------------------------------------------------------------------------------------------------------------------------|---------------------------------------------------------------------------------------------------------------------------------------------------------------------------------------------------------------------------------------------------------------------------------------------------------------------------------------------------------------------------------------------------|
| Awareness of signs/symptoms of pregnancy                     | 46–51                        | <b>Pregnancy awareness and disclosure</b> —awareness of signs and symptoms of pregnancy; cultural reasons for keeping pregnancy secret                                                                                                                         | <b>Pregnancy as socially contingent and physiologically healthy</b> —pregnancy as a normal life event—only attend antenatal care when sick; lack of awareness of pregnancy indicators; lack of understanding of antenatal care benefits; embarrassment; cultural and supernatural implications of pregnancy disclosure; preference for traditional healers and medicines (including cost savings) |
| Cultural reasons for keeping pregnancy secret                | 46,48,49,52–57               |                                                                                                                                                                                                                                                                |                                                                                                                                                                                                                                                                                                                                                                                                   |
| Don't recognise/understand Western approaches to health care | 46,47,54,56,58,60            | <b>Resistance to risk-averse care models</b> —don't recognise/understand Western approaches to health care; lack of perceived benefits; pregnancy as a normal life event; reliance on traditional/alternative antenatal practices; influence of family members |                                                                                                                                                                                                                                                                                                                                                                                                   |
| Lack of perceived benefits of attendance                     | 46–48,51,56,58,59,62–64      |                                                                                                                                                                                                                                                                |                                                                                                                                                                                                                                                                                                                                                                                                   |
| Pregnancy as a normal life event                             | 46,50–54,56,58–61,66         |                                                                                                                                                                                                                                                                |                                                                                                                                                                                                                                                                                                                                                                                                   |
| Reliance on traditional/alternative antenatal practices      | 50,52,54,58,60–62            |                                                                                                                                                                                                                                                                |                                                                                                                                                                                                                                                                                                                                                                                                   |
| Influence of family members                                  | 50,51,62–64                  |                                                                                                                                                                                                                                                                |                                                                                                                                                                                                                                                                                                                                                                                                   |
| Costs (direct and indirect)                                  | 46,49,50–56,58–66            | <b>Prioritising limited resources for basic survival</b> —costs (direct and indirect); laziness                                                                                                                                                                | <b>Resource use and survival in conditions of extreme poverty</b> —costs (direct and indirect), transport, and distance; time off work and child care—may be made to wait several hours; inadequate infrastructure (especially in rural areas); potential for accident/attack en route                                                                                                            |
| Laziness                                                     | 46,47,49,62                  |                                                                                                                                                                                                                                                                |                                                                                                                                                                                                                                                                                                                                                                                                   |
| Lack of transport and distance to clinic                     | 46,48,50,54–56,58,60,65      | <b>Difficult and dangerous travel</b> —lack of transport and distance to clinic; inadequate infrastructure                                                                                                                                                     |                                                                                                                                                                                                                                                                                                                                                                                                   |
| Inadequate infrastructure                                    | 48,49,55,58,60–62,64         |                                                                                                                                                                                                                                                                |                                                                                                                                                                                                                                                                                                                                                                                                   |
| Lack of staff/medicine/care at clinic                        | 49,50,54,56,58,65            | <b>Attending clinics is not worth the effort</b> —lack of staff/medicine/care at clinic; waiting times at clinic                                                                                                                                               | <b>Not getting it right the first time</b> —poor staff attitude; inflexibility of antenatal care services; issuing of cards for delivery at a hospital (women don't return) and staff giving card holders preferential treatment; few, poorly trained staff; lack of facilities; lack of medicines                                                                                                |
| Waiting times at clinic                                      | 46,48–50,52,                 |                                                                                                                                                                                                                                                                |                                                                                                                                                                                                                                                                                                                                                                                                   |
| Attendance only to get a card (for hospital delivery)        | 46,47,50,52,61               | <b>Locally determined rules of access</b> —attendance only to get a card; inflexible booking systems                                                                                                                                                           |                                                                                                                                                                                                                                                                                                                                                                                                   |
| Inflexible booking systems                                   | 46,63                        |                                                                                                                                                                                                                                                                |                                                                                                                                                                                                                                                                                                                                                                                                   |
| Poor staff attitude                                          | 46,48–51,53,55–57, 62,65,66  | <b>Insensitivity, disrespect, and abuse</b> —poor staff attitude; embarrassment                                                                                                                                                                                |                                                                                                                                                                                                                                                                                                                                                                                                   |
| Embarrassment (about examination or inability to pay)        | 46,49,56,65,                 |                                                                                                                                                                                                                                                                |                                                                                                                                                                                                                                                                                                                                                                                                   |

doi:10.1371/journal.pmed.1001373.t002

Pregnancy was viewed as a normal life event rather than a medical condition requiring professional monitoring and supervision. This was especially true for multiparous women who had experienced one or more healthy pregnancies [50,54,58].

*If a woman has always delivered well, she does not see the need for antenatal care attendance or visiting the health unit to deliver.*  
[Pregnant woman, rural Uganda] [54]

In some hierarchical cultures the decision to engage with antenatal services was made by tribal elders, husbands,

mothers-in-law, or senior family members rather than the women themselves [50,56,59,62–64]. Findings from a Nepalese study highlight the central role played by the mother-in-law when it came to making decisions about whether to go for antenatal care.

*My mother-in-law doesn't help. It might be due to her past experiences. She used to do all the work by herself during her time of pregnancy, so she wants me to do the same. I have lots of work here at home so I don't go for [antenatal care] check-ups.* [Non-user of antenatal care services, rural Nepal] [59]

## Theme Two: Resource Use and Survival in Conditions of Extreme Poverty

All of the studies were conducted in populations affected by poverty, and our findings suggest that, in such circumstances, limited personal resources were often directed towards immediate survival needs rather than specific pregnancy-related concerns. Even when antenatal care was offered free of charge, the cost of transport (sometimes across difficult or dangerous terrain), the loss of women's labour to the family, and the possibility of having to pay for additional medicines rendered attendance impossible.

**Using resources for health care or basic survival: “If there is no money, we can't go”.** In virtually all of the identified studies [46,49,50–56,58–66], the costs (both direct and indirect) of visiting antenatal facilities were viewed as a significant factor in restricting or inhibiting access to antenatal care:

*It is good to go to the doctor during pregnancy, but if there is no money we can't go. I wanted to go but I didn't have the money to pay.* [Limited user of antenatal care services, Mumbai, India] [58]

Even in countries offering free access to antenatal care, the unanticipated costs of paying for drugs, tests, and medical cards placed an additional strain on limited family finances.

*The reason I did not go back there [to the antenatal clinic] is because my husband only buys what he wants when he is given the prescription. For example, when there are three things prescribed he buys only two. So, why should I take the trouble to go there for nothing? If I go to the clinic every month, he will just ask how much I think he earns to be able to buy so many medications for me.* [Limited user of antenatal care services, Benin] [53]

The indirect costs of getting to and from antenatal facilities were highlighted consistently in the included studies, especially those conducted in rural areas [46,48,50,54–56,58,60]. The prohibitive costs of taxi and bus fares prevented some women from visiting antenatal clinics, and, in cases of extreme poverty, even the most basic forms of transport came at an unaffordable price.

*When I was pregnant what prevented me from seeking healthcare was lack of transport money because my legs were a problem. I used to live far away in the hills and I could not ask anyone to take me on a bicycle because I would be asked for money.* [Adolescent limited user of antenatal care services, rural Uganda] [56]

Some of the respondents' accounts indicated that the need for women to contribute to relatively meagre household resources was more than simply a useful contribution. It was perceived to be crucial for survival, especially at significant times in the farming cycle:

*When I had a third pregnancy, it was harvest season. So I wanted to help my husband, even during the pregnancy.* [Non-user of antenatal care services, rural Cambodia] [50]

**Difficult and dangerous travel: “It is so far and the road condition is too bad”.** Many of the studies included in this synthesis were conducted in predominantly rural areas with relatively basic transport networks. For pregnant women living in towns and villages without community health care facilities, the need to journey to distant locations to receive antenatal care

presented travelling difficulties, which they were unwilling or unable to overcome [46,47,50,52,58,60,62].

*I never visited the health centre to check my pregnancy because it is so far and the road condition is too bad.* [Non-user of antenatal care services, rural Cambodia] [50]

Even in situations where women were prepared to make lengthy journeys on foot, sometimes walking for three to four hours, the associated risks and challenges occasionally prevented them from doing so. In parts of Africa, the prospect of being attacked by wild animals or aggressive men deterred women from making these journeys, whilst in South East Asia, the deterioration of the roads during the rainy season had a similar detrimental effect. This suggests that the barriers were not just nonexistent or expensive transportation, or inadequate roads, but also the fear of physical harm, which outweighed any benefits that might be gained from antenatal care:

*It is really hard when it is raining. We are afraid we will fall over because the road is so slippery and we are pregnant. The health centre is far and you can see that the road is poor.* [Limited user of antenatal care services, West Java, Indonesia] [60]

## Theme Three: Not Getting It Right the First Time

Given the very real and critical issues of how women perceive pregnancy, and of the economic and physical sacrifice needed from the woman and her family to get her to a central antenatal clinic, it is crucial that the services she receives when she gets there are “fit for purpose”, and that the benefits are perceived to outweigh potential harms. Unfortunately, for many of the women included in this review, this was not the case.

**Attending clinics is not worth the effort: “It's better to go to the TBA [traditional birth attendant]”.** The relatively poor economic circumstances of the countries included in this study meant that clinics were often severely under-resourced. Pregnant women who initially recognised the benefits of antenatal care and who made the often significant financial and personal sacrifices to visit health care facilities were often disappointed by the lack of resources they found when they finally got there. As a consequence, they made the decision not to return [48–50,54,56,58,65].

*I don't visit the health centre for antenatal care because the health centre doesn't have enough medical equipment. When we have a problem, all they will probably do is refer us to the referral hospital....* [Non-user of antenatal care services, rural Cambodia] [50]

The amount of time women had to wait to be seen by health professionals, especially after long and difficult journeys, was a common cause of complaint and discouraged some of them from attending again [46,48,49,52,54,65]. Pregnant women also complained about the cursory nature of consultations in understaffed clinics and made the decision to revert to more traditional forms of antenatal care.

*They just touch your abdomen, it's better to go to the TBA [traditional birth attendant] because the TBA examines the mother and tells her how the baby is lying in her stomach.* [Pregnant woman, rural Uganda] [54]

**Locally determined rules of access: “If you do not have a card, they will not accept you”.** Our findings suggest that in a

number of cases, particularly in sub-Saharan Africa, the practice of giving antenatal cards to women attending the clinic is being poorly managed and is having a detrimental effect on continued access. Some health care providers use the clinic card as “a passport” and refuse to admit labouring women to a clinic or hospital if they do not have one [46,49,52,53,65]. This kind of negative reinforcement has created a situation in which pregnant women visit an antenatal facility only once—to get a “clinic card”.

*I am just afraid of being denied services when I need them, so one must just go [to antenatal care] to get the [clinic] card. If you do not have a card, they will not accept you when there is a problem... otherwise we could just rest at home. [Woman in ninth month of pregnancy, rural Tanzania] [65]*

**Disrespect and abuse: “They don’t care for patients”.** One of the most common reasons given for delaying or restricting antenatal visits was the poor attitude of staff at health care facilities [46,48,50,51,53,56,62,63,65,66]. Findings from countries in Africa, Asia, and South America highlight insensitivity, rudeness, humiliation, neglect, abuse, and even physical violence by health centre staff as key factors in limiting women’s accessing of antenatal care. Sometimes the poor attitude of health care providers was described by what they failed to do, as recounted by a young woman in Uganda:

*They [health care workers at an antenatal clinic] don’t care for patients, for example when you go in the morning they will ask you “at your home don’t you sleep?”. When you go at lunch time they will ask you whether at your place you don’t take lunch. And when you go in the evening they will tell you they have closed up. [56]*

Authors also reported that women felt intimidated because of the potential for abuse:

*When you see the health agent yelling at women who are not feeling well, you are afraid of telling them what is wrong with you too.... [Pregnant woman, Benin] [53]*

In other contexts, women recounted being punished or humiliated because of some perceived minor misdemeanour:

*If you arrive late at the clinic, the staff rebukes and punishes you with a fine or they order you to clean the floor or sweep the surroundings. [Limited user of antenatal care services, rural Tanzania] [65]*

In all of these examples, women reported feeling reluctant to return for another appointment, and some reverted to more traditional forms of antenatal care as a consequence.

### Line-of-Argument Synthesis

Antenatal care provision that is based on a concept of pregnancy as a potentially risky biomedical state, and that, as a consequence, provides mechanisms focused mainly on surveillance in more or less centralised locations, is contextually at odds with the theories, beliefs, and socio-economic situations of pregnant women and their families in a range of LMICs. This situation is compounded when accessing services presents additional risks to women and their families, in terms of lost labour or income, or physical danger; when the promised care is not delivered because

of resource constraints; and when women experience covert or overt abuse in care settings.

### Hypothesis Based on the Findings

Following the claim by Pawson [67] that “programmes are theory incarnate”, our data can illuminate the potential inconsistencies between theories underpinning antenatal care programmes based on the WHO antenatal care model [23] and the themes that underpin the beliefs, actions, and experiences (the local context) of those to whom these programmes are targeted (see Figure 2). We hypothesize that the dissonance between these two frames of reference might explain the lack of initial attendance at antenatal clinics, as described in the first row of Figure 2. The second row of the figure illustrates a second misalignment, this time between the principles assumed to underpin antenatal care provision, and the experiences of women who use them. We hypothesize that this misalignment may explain the lack of return visits for antenatal care after the first encounter.

### Testing for Theoretical Saturation

The data from the one paper [45] we identified after the end of our formal search phase in March 2011 can be incorporated into our explanatory model, suggesting theoretical saturation. We would argue that future studies should therefore focus on testing our hypothesis, and designing specific solutions to the problem of inadequate attendance building on this summary of all the relevant qualitative data to date. This approach would avoid the problem of “analytic interruptus” described by Statham in relation to the continual reproduction of single-site qualitative studies with no attempt to translate the emerging theoretical insights into action [68].

### Discussion

Some of the issues identified by this meta-synthesis are common to other areas of maternity care and health care in general. At the family level, these include lack of household resources, especially when faced with the problem of formal and informal payment or services [69,70], and the problems inherent in travel to centralised health care services [46,51–54,71]. Restricted autonomy for women has been identified as a factor underpinning inability to make personal decisions about health service use [72], and this factor is one of the underlying elements of the “three delays” hypothesis relating to lack of accessing of emergency care in labour [73]. There is also an increasing recognition of the problem of human rights abuses in health care in general [74–76].

From a theoretical perspective our findings suggest the hypothesis that, in certain contexts, there may be a misalignment between the theories that underpin the provision of antenatal care and the beliefs and socio-economic contexts of women who access services irregularly or not at all. The dissonance between these two frames of reference might explain the lack of initial access to antenatal care. A second disparity, this time between the nature of antenatal provision and the expectations of the women who use the services, may explain the lack of continued engagement. We are not aware of previous studies that have integrated these factors into an analysis of antenatal care use based on women’s views and experiences, or that have identified pregnancy as a socially risky but physically healthy state. Minimising social stigma and risk requires care provision that is discrete and certainly not provided in public places subject to long queues for services. Strategies incorporating culturally appropriate understandings of maternity care tailored to individual communities are rare, but participatory programmes where local women and community leaders are



| A. Programme design                              |                                                                                                      | B. Women's views and experiences |                                                                                                                                                                                                        | Consequence of differences between A and B | Hypothesised outcome                                  |
|--------------------------------------------------|------------------------------------------------------------------------------------------------------|----------------------------------|--------------------------------------------------------------------------------------------------------------------------------------------------------------------------------------------------------|--------------------------------------------|-------------------------------------------------------|
| Standard antenatal programmes (WHO) [23]         |                                                                                                      | Findings from meta-synthesis     |                                                                                                                                                                                                        |                                            |                                                       |
| Theories that underpin antenatal care programmes | Pregnancy is potentially risky for mother and baby                                                   | Beliefs and attitudes            | Pregnancy is a healthy physical state                                                                                                                                                                  | Lack of initial access to antenatal care   | Increased maternal and infant morbidity and mortality |
|                                                  | Pregnancy is a positive social state, that will, in general, be welcomed by the family and community |                                  | Pregnancy can be socially risky. It can be subject to malign magical forces from jealous relatives and community members                                                                               |                                            |                                                       |
|                                                  | Women and families have enough resources to make rational economic choices to access care            |                                  | A choice to access care might mean a risk to survival, either due to resultant lack of food in the future, or because of the difficulties and dangers associated with travel to health care facilities |                                            |                                                       |
| Principles of care delivery                      | Antenatal care is affordable                                                                         | Experience of care delivery      | Antenatal care is subject to unexpected costs levied at the point of need                                                                                                                              | Lack of repeat access to antenatal care    |                                                       |
|                                                  | Staff attitude is not relevant, and/or is generally positive                                         |                                  | Staff attitude is highly relevant, and can be discriminatory, neglectful or even abusive                                                                                                               |                                            |                                                       |
|                                                  | All the resources needed for the level of care on offer are present                                  |                                  | Resources are often not available, and transfer is then necessary to the next level of care                                                                                                            |                                            |                                                       |

**Figure 2. Hypothetical model of inadequate access to antenatal care in low and middle income countries.**  
doi:10.1371/journal.pmed.1001373.g002

actively engaged in the planning of local antenatal services have been shown to be effective in increasing antenatal coverage and reducing maternal and infant mortality [77]. This approach is well illustrated by a recent Cambodian study, which showed a 22% increase in antenatal attendance when service users and influential stakeholders became involved in the planning of community maternity services [78].

From a socio-economic perspective our findings suggest that, even in situations where women recognise the benefits of antenatal care and are willing, in principle, to attend, the physical barriers and even physical risks of getting to and from the clinic, coupled with the potential loss of crucial family resources, can be prohibitive. Even if services are free (with no covert point-of-care costs) and safe transport systems are provided, taking women from essential farming duties on long trips to and from central clinics might, at the extreme, still present a risk to family food supplies. In this case, the benefits of antenatal care must weigh strongly in the balance for service users before uptake will increase. Also, even where women do have a degree of personal autonomy, those who see pregnancy as a healthy state, but as socially risky, are still unlikely to value and attend programmes that expose their pregnant state, and that are largely focused on identifying and averting risk. This is especially pertinent when both the direct and opportunity costs are high, travel to central locations is difficult and dangerous, and the services they receive are of poor quality and overtly or covertly abusive.

Projects designed to incentivise pregnant women to attend antenatal care have been implemented successfully in some

LMICs. The Janani Suraksha Yojana cash transfer programme in India, where women are paid a small amount to attend antenatal care and give birth in a recognised health care facility, has had a significant effect on antenatal attendance and subsequent levels of neonatal and perinatal mortality [79]. An alternative, transport-based project in eastern Uganda, where local motorcycle riders were contracted to take women to and from antenatal clinics throughout their pregnancy, also showed a significant increase in antenatal attendance [80]. However, doubts remain about the practicality and sustainability of these kinds of initiatives, and, as our findings illustrate, many pregnant women remain unconvinced by the focus and quality of antenatal programmes, and seem unlikely to make full use of antenatal facilities unless care quality is improved.

Given that data were not available from every region of every LMIC, it is possible that our line-of-argument synthesis, and our model, do not apply to all contexts in which antenatal care is underused. However, the comprehensiveness of our analysis is reinforced by evidence of theoretical saturation, both from our refutational analysis, and from the paper [45] published after the end of our formal search phase in March 2011. Our hypothetical model can explain the findings of this study, including the influence of cultural beliefs and lack of respect from health care professionals. In addition, the findings of the meta-synthesis are similar to those of a parallel review of women's accounts of non-accessing or limited accessing of antenatal care in resource-rich countries [19]. Given the range of countries that were represented

in the meta-synthesis, and the date range of the publications (over nearly two decades), the issues seem to be universal and persistent.

We hope that our synthesis illustrates the need to move from small repeated studies of the same problem in local contexts towards a more comprehensive understanding of the potential dissonance between context and service delivery mechanism across all of these settings. A more thorough evaluation using the realist review approach could test this hypothesis, and contribute towards a more detailed understanding of this issue [81]. This could provide the basis for a new approach to the design and delivery of antenatal care, founded on a careful analysis of distinctive local beliefs, values, and resource availability. Such an approach could identify a way of moving services away from broad population-based solutions, towards new service designs based on what works, for whom, in what circumstances [81].

## Conclusion

Despite moderate success in reducing MMRs and increasing antenatal care coverage, the global targets associated with MDG 5 seem unlikely to be attained by 2015, especially in many LMICs. So far, practical initiatives to address these issues have tended to adopt centralised, public provision of antenatal care based on utilitarian strategies designed to minimise clinical risk. This approach benefits some women and infants, but it marginalises others, as the programme design does not take into account

necessary survival decisions, beliefs, attitudes, or cultural theories that may be intrinsic to the local context. Measures designed to sustain and maintain access in LMICs are likely to be more effective when policy makers and service providers align their programmes with the theoretical and philosophical constructs and the severe practical constraints that underpin the local community context. Such programmes must ensure that, once they access services, all pregnant women are treated with dignity, respect, and compassion. If programme delivery is not aligned with local contexts in this way, the findings from this meta-synthesis suggest, even the best and most physically accessible services may remain underused by some local pregnant women.

## Supporting Information

**Table S1 Assessment of quality of included studies.** (RTF)

## Author Contributions

Conceived and designed the experiments: KWF SD. Analyzed the data: KWF SD. Contributed reagents/materials/analysis tools: KWF SD. Wrote the first draft of the manuscript: KWF. Contributed to the writing of the manuscript: KWF SD. ICMJE criteria for authorship read and met: KWF SD. Agree with manuscript results and conclusions: KWF SD.

## References

- Hogan MC, Foreman KJ, Naghavi M, Ahn SY, Wang M, et al. (2010) Maternal mortality for 181 countries, 1980–2008: a systematic analysis of progress towards Millennium Development Goal 5. *Lancet* 375: 1609–1623.
- United Nations (2011) The Millennium Development Goals report 2011. New York: United Nations.
- United Nations (2000) United Nations millennium declaration. Fifty-fifth session of the United Nations General Assembly. New York: United Nations.
- World Health Organization, United Nations Children's Fund, United Nations Population Fund, The World Bank (2010) Trends in maternal mortality: 1990–2008. Geneva: World Health Organization.
- World Health Organization, United Nations Children's Fund (2012) Countdown to 2015: building a future for women and children—the 2012 report. Available: <http://countdown2015mchc.org/documents/2012Report/2012-Complete.pdf>. Accessed 3 December 2012.
- Campbell O, Graham W (2006) Strategies for reducing maternal mortality: getting on with what works. *Lancet* 368: 1284–1299.
- World Health Organization (2007) Standards for maternal and neonatal care. Geneva: World Health Organization.
- Ronsmans C, Graham WJ (2006) Maternal mortality: who, when, where, and why. *Lancet* 368: 1189–1200.
- Carroli G, Rooney C, Villar J (2001) How effective is antenatal care in preventing maternal mortality and serious morbidity? An overview of the evidence. *Paediatr Perinat Epidemiol* 15 (Suppl 1): 1–42.
- World Health Organization, United Nations Children's Fund (2003) Antenatal care in developing countries—promises, achievements and missed opportunities. Geneva: World Health Organization.
- Houweling TAJ, Ronsmans C, Campbell OMR, Kunst AE (2007) Huge poor-rich inequalities in maternity care: an international comparative study of maternity and child care in developing countries. *Bull World Health Organ* 85: 745–754.
- Simkhada B, van Teijlingen ER, Porter M, Simkhada P (2008) Factors affecting the utilization of antenatal care in developing countries: systematic review of the literature. *J Adv Nurs* 61: 244–260.
- Kabir M, Iliyasu Z, Abubakar IS, Sani AA (2005) Determinants of utilization of antenatal care services in Kumbotso village, Northern Nigeria. *Trop Doct* 35: 110–111.
- Trinh LTT, Dibley JM, Byles J (2007) Determinants of antenatal care utilization in three rural areas of Vietnam. *Public Health Nurs* 24: 300–310.
- Brown CA, Sohani SB, Khan K, Lilford R, Mukhwana W (2008). Antenatal care and perinatal outcomes in Kwale District, Kenya. *BMC Pregnancy Childbirth* 8: 2. doi:10.1186/1471-2393-8-2
- Basani DG, Surkan PJ, Olinto MTA (2009) Inadequate use of prenatal services among Brazilian women: the role of maternal characteristics. *Int Perspect Sex Reprod Health* 35: 15–20.
- Ali AAA, Osman MM, Abbaker AO, Adam I (2010) Use of antenatal care services in Kassala, eastern Sudan. *BMC Pregnancy Childbirth* 10: 67. doi:10.1186-2393-10-67
- Rowe RE, Garcia J (2003) Social class, ethnicity and attendance for antenatal care in the United Kingdom: a systematic review. *J Public Health Med* 25: 113–119.
- Downe S, Finlayson K, Walsh D, Lavender T (2009) 'Weighing up and balancing out': a meta-synthesis of barriers to antenatal care for marginalised women in high-income countries'. *BJOG* 16: 518–529.
- Centre for Maternal and Child Enquiries (2011). Saving mothers' lives: reviewing maternal deaths to make motherhood safer: 2006–08. The eighth report on confidential enquiries into maternal deaths in the United Kingdom. *BJOG* 118 (Suppl 1): 1–203.
- Thomson G, Dykes F, Singh G, Cawley L, Dey P (2012) A public health perspective of women's experiences of antenatal care: an exploration of insights from a community consultation. Midwifery. E-pub ahead of print. doi:10.1016/j.midw.2012.01.002
- Villar J, Ba'aqel H, Piaggio G, Lumbiganon P, Belizán JM, et al. (2001) WHO antenatal care randomised trial for the evaluation of a new model of routine antenatal care. *Lancet* 357: 1551–1564.
- World Health Organization (2002) WHO antenatal care randomized trial: manual for the implementation of the new model. Geneva: World Health Organization.
- US Agency for International Development (2007) Focused antenatal care: providing integrated, individualized care during pregnancy. Available: [http://www.accesstohealth.org/toolres/pdfs/ACCESStechbrief\\_FANC.pdf](http://www.accesstohealth.org/toolres/pdfs/ACCESStechbrief_FANC.pdf). Accessed 3 December 2012.
- BMJ Evidence Centre (2011) Best practice: routine antenatal care. Available: <http://bestpractice.bmj.com/best-practice/monograph/493.html>. Accessed 3 December 2012.
- Dowswell T, Carroli G, Duley L, Gates S, Gülmezoglu AM, et al. (2010) Alternative versus standard packages of antenatal care for low-risk pregnancy. *Cochrane Database Syst Rev* 2010: CD000934. doi:10.1002/14651858.CD000934.pub2
- Mathai M (2011 January 1) Alternative versus standard packages of antenatal care for low-risk pregnancy. Geneva: The WHO Reproductive Health Library.
- Kyomuhendo GB (2003) Low use of rural maternity services in Uganda: impact of women's status, traditional beliefs and limited resources. *Reprod Health Matters* 11: 16–26.
- Regmi K, Madison J (2009) Contemporary childbirth practices in Nepal: improving outcomes. *Br J Midwifery* 17: 382–387.
- Amooti-Kaguna B, Nuwaha F (2000) Factors influencing choice of delivery sites in Rakai district of Uganda. *Soc Sci Med* 50: 203–213.
- Sandelowski M (2006) Meta-jeopardy: the crisis of representation in qualitative metasynthesis. *Nurs Outlook* 54: 10–16.
- Noyes J, Lewin S (2011 August) Supplemental guidance on selecting a method of qualitative evidence synthesis, and integrating qualitative evidence with Cochrane intervention reviews. In: Noyes J, Booth A, Hannes K, Harden A, Harris J, et al., editors. Supplemental guidance for inclusion of qualitative research in Cochrane systematic reviews of interventions, version 1. Cochrane

- Collaboration Qualitative Methods Group. Available: <http://cqrmg.cochrane.org/supplemental-handbook-guidance> Accessed 3 December 2012.
33. Noblit GW, Hare RD (1988) *Meta-ethnography: synthesizing qualitative studies*. Newbury Park (California): Sage.
  34. Sandelowski M, Docherty S, Emden C (1997) *Qualitative meta-synthesis: issues and techniques*. *Res Nurs Health* 20: 365–371.
  35. Walsh D, Downe S (2005) *Meta-synthesis method of qualitative research: a literature review*. *J Adv Nurs* 50: 204–211.
  36. Dixon-Woods M, Agarwal S, Jones D, Young B, Sutton A (2005) *Synthesising qualitative and quantitative evidence: a review of possible methods*. *J Health Serv Res Policy* 10: 45–53.
  37. Jensen LA, Allen MN (1996) *Meta-synthesis of qualitative findings*. *Qual Health Res* 6: 553–560.
  38. Ring N, Ritchie K, Mandava L, Jepson R (2010) *A guide to synthesising qualitative research for researchers undertaking health technology assessments and systematic reviews*. Available: [http://www.healthcareimprovementscotland.org/programmes/clinical\\_\\_cost\\_effectiveness/programme\\_resources/synthesising\\_research.aspx](http://www.healthcareimprovementscotland.org/programmes/clinical__cost_effectiveness/programme_resources/synthesising_research.aspx). Accessed 3 December 2012.
  39. The World Bank (2010) *Country and lending groups [database]*. Available: <http://data.worldbank.org/about/country-classifications/country-and-lending-groups>. Accessed 3 December 2012.
  40. Downe S, Simpson L, Trafford K (2007) *Expert intra-partum maternity care: a meta-synthesis*. *J Adv Nurs* 27: 127–140.
  41. Lincoln YS, Guba EG (1985) *Naturalistic enquiry*. Newbury Park (California): Sage.
  42. Britten N, Campbell R, Pope C, Donovan J, Morgan M, et al. (2002) *Using meta ethnography to synthesise qualitative research: a worked example*. *J Health Serv Res Policy* 7: 209–215.
  43. Smith LK, Pope C, Botha JL (2005) *Patients' help-seeking experiences and delay in cancer presentation: a qualitative synthesis*. *Lancet* 366: 825–831.
  44. Pound P, Britten N, Morgan M, Yardley L, Pope C, et al. (2005) *Resisting medicines: a synthesis of qualitative studies of medicine taking*. *Soc Sci Med* 61: 133–155.
  45. Ngomane S, Mulaudzi FM (2012) *Indigenous beliefs and practices that influence the delayed attendance of antenatal clinics by women in the Bohlabele district in Limpopo, South Africa*. *Midwifery* 28: 30–38.
  46. Abrahams N, Jewkes R, Mvo Z (2001) *Health care-seeking practices of pregnant women and the role of the midwife in Cape Town, South Africa*. *J Midwifery Womens Health* 46: 240–247.
  47. Myer L, Harrison A (2003) *Why do women seek antenatal care late? Perspectives from rural South Africa*. *J Midwifery Womens Health* 48: 268–272.
  48. Pretorius CF, Greff M (2004) *Health service utilization by pregnant women in the greater Mafikeng-Mmabatho district*. *Curatiosis* 27: 72–81.
  49. Mrisho M, Obrist B, Schellenberg JA, Haws RA, Mushi AK, et al. (2009) *The use of antenatal and postnatal care: perspectives and experiences of women and health care providers in rural southern Tanzania*. *BMC Pregnancy Childbirth* 9: 10. doi:10.1186/1471-2393-9-10
  50. Matsuoka S, Aiga H, Rasmey LC, Rathavy T, Okitsu A (2010) *Perceived barriers to utilization of maternal health services in rural Cambodia*. *Health Policy* 95: 255–263.
  51. Choudhury N, Ahmed SM (2011) *Maternal care practices among the ultra poor households in rural Bangladesh: a qualitative exploratory study*. *BMC Pregnancy Childbirth* 11: 15. doi:10.1186/1471-2393-11-15
  52. Chapman RR (2003) *Endangering safe motherhood in Mozambique: prenatal care as pregnancy risk*. *Soc Sci Med* 57: 355–374.
  53. Grossmann-Kendall F, Filippi V, De Koninck M, Kanhonou L (2001) *Giving birth in maternity hospitals in Benin: testimonies of women*. *Reprod Health Matters* 9: 90–98.
  54. Ndyomugenyi R, Neema S, Magnussen P (1998) *The use of formal and informal services for antenatal care and malaria treatment in rural Uganda*. *Health Policy Plan* 13: 94–102.
  55. Gcaba R, Brookes HB (1992) *The un-booked maternity patient in an academic hospital in Durban*. *Curatiosis* 15: 43–47.
  56. Atuyambe L, Mirembe F, Johansson A, Kirumira EK, Faxelid E (2009) *Seeking safety and empathy: adolescent health seeking behaviour during pregnancy and early motherhood in central Uganda*. *J Adolesc* 32: 781–796.
  57. Stokes E, Dumbaya I, Owens S, Brabin L (2008) *The right to remain silent: a qualitative study of the medical and social ramifications of pregnancy disclosure for Gambian women*. *BJOG* 115: 1641–1647.
  58. Griffiths P, Stephenson R (2001) *Understanding users' perspectives of barriers to maternal health care use in Maharashtra, India*. *J Biosoc Sci* 33: 339–359.
  59. Simkhada B, Porter MA, Van Teijlingen ER (2010) *The role of mothers-in-law in antenatal care decision-making in Nepal: a qualitative study*. *BMC Pregnancy Childbirth* 10: 34. doi:10.1186/1471-2393-10-34
  60. Titaley CR, Hunter CL, Heywood P, Dibley MJ (2010) *Why don't some women attend antenatal and postnatal care services?: a qualitative study of community members' perspectives in Garu, Sukambi and Ciamis districts of West Java Province, Indonesia*. *BMC Pregnancy Childbirth* 10: 61. doi:10.1186/1471-2393-10-61
  61. Family Care International (2003) *Care seeking during pregnancy, delivery and the post-partum period: a study in Hombay and Migori districts, Kenya*. New York: Family Care International. Available: <http://www.familycareintl.org/UserFiles/File/SCI%20Kenya%20qualitative%20report.pdf>. Accessed 3 December 2012.
  62. Tinoco-Ojanguren R, Glantz NM, Martinez-Hernandez I, Ovando-Meza I (2008) *Risk screening, emergency care, and lay concepts of complications during pregnancy in Chiapas, Mexico*. *Soc Sci Med* 66: 1057–1069.
  63. Mumtaz Z, Salway SM (2007) *Gender, pregnancy and the uptake of antenatal care services in Pakistan*. *Social Health Illn* 29: 1–26. doi:10.1111/j.1467-9566.2007.00519.x
  64. Chowdhury AM, Mahub A, Chowdhury AS (2003) *Skilled attendance at delivery in Bangladesh: an ethnographic study*. Research Monograph Series No. 22. Dhaka (Bangladesh): BRAC.
  65. Mubyazi GM, Bloch P, Magnussen P, Olsen OE, Byskov J, et al. (2010) *Women's experiences and views about costs of seeking malaria chemoprevention and other antenatal services: a qualitative study from two districts in rural Tanzania*. *Malar J* 9: 54. doi:10.1186/1475-2875-9-54
  66. Kabakian-Khosholian T, Campbell O, Shediak-Rizkallah M, Ghorayeb F (2000) *Women's experiences of maternity care: satisfaction or passivity?* *Soc Sci Med* 51: 103–113.
  67. Pawson R (1998) *Caring communities, paradigm polemics, design debates*. *Evaluation* 4: 73–90.
  68. Statham A (1988) *Women's approach to work: the creation of knowledge*. In: Statham A, editor. *The worth of women's work: a qualitative synthesis*. Albany: State University of New York Press.
  69. Johnson A, Goss A, Beckerman J, Castro A (2012) *Hidden costs: the direct and indirect impact of user fees on access to malaria treatment and primary care in Mali*. *Soc Sci Med* 75: 1786–1792.
  70. Perkins M, Brazier E, Themmen E, Bassane B, Diallo D, et al. (2009) *Out-of-pocket costs for facility-based maternity care in three African countries*. *Health Policy Plan* 24: 289–300.
  71. Pandian JD, Srikanth V, Read SJ, Thrift AG (2007) *Poverty and stroke in India: a time to act*. *Stroke* 38: 3063–3069.
  72. Ravindran TS (2012) *Universal access: making health systems work for women*. *BMC Public Health* 22 (Suppl 1): S4. doi:10.1186/1471-2458-12-S1-S4
  73. Thaddeus S, Maine D (1994) *Too far to walk: maternal mortality in context*. *Soc Sci Med* 38: 1091–1110.
  74. Gruskin S, Mills EJ, Tarantola D (2007) *History, principles, and practice of health and human rights*. *Lancet* 370: 449–455.
  75. Bowser D, Hill K (2010) *Exploring evidence for disrespect and abuse in facility-based childbirth: report of a landscape analysis*. Washington (District of Columbia): US Agency for International Development. Available: <http://www.tractionproject.org/sites/default/files/upload/RFA/Respectful%20Care%20at%20Birth%20209-20-101%20Final.pdf>. Accessed 3 December 2012.
  76. White Ribbon Alliance (2011) *Respectful maternity care: the universal rights of childbearing women*. Available: [http://www.whiteribbonalliance.org/WRA/assets/File/Final\\_RMC\\_Charter.pdf](http://www.whiteribbonalliance.org/WRA/assets/File/Final_RMC_Charter.pdf). Accessed 3 December 2012.
  77. Manandhar DS, Osrin D, Shrestha BP, Mesko N (2004) *Effect of a participatory intervention with women's groups on birth outcomes in Nepal: cluster-randomized controlled trial*. *Lancet* 364: 970–979.
  78. Skinner J, Rathavy T (2009) *Design and evaluation of a community participatory birth preparedness project in Cambodia*. *Midwifery* 25: 738–743.
  79. Lim S, Dandona L, Hoisington J, James S, Hogan M, et al. (2010) *India's Janani Suraksha Yojana, a conditional cash transfer programme to increase births in health facilities: an impact evaluation*. *Lancet* 375: 2009–2023.
  80. Pariyo GW, Mayora C, Okui O, Ssegooba F, Peters DF, et al. (2011) *Exploring new health markets: experiences of informal providers of transport for maternal health services in Eastern Uganda*. *BMC Int Health Hum Rights* 11 (Suppl 1): S10. doi:10.1186/1472-698X-11-S1-S10
  81. Pawson R, Greenhalgh T, Harvey G, Walshe K (2005) *Realist review—a new method of systematic review designed for complex policy interventions*. *J Health Serv Res Policy* 3 (Suppl 1): 21–34.

## Editors' Summary

**Background.** Although maternal deaths worldwide have almost halved since 1990, according to the latest figures, every day roughly 800 women and adolescent girls still die from the complications of pregnancy or childbirth: in 2010, 287,000 women died during or following pregnancy and childbirth, with almost all of these deaths (99%) occurring in low-resource settings. Most maternal deaths are avoidable, as the interventions to prevent or manage the most common complications (severe bleeding, infections, high blood pressure during pregnancy, and unsafe abortion) are well known. Furthermore, many of these complications can be prevented, detected, or treated during antenatal care visits with trained health workers.

**Why Was This Study Done?** The World Health Organization (WHO) recommends a minimum of four antenatal visits per pregnancy, but according to WHO figures, between 2005 and 2010 only 53% of pregnant women worldwide attended the recommended four antenatal visits; in low-income countries, this figure was a disappointing 36%. Unfortunately, despite huge international efforts to promote and provide antenatal care, there has been little improvement in these statistics over the past decade. It is therefore important to investigate the reasons for poor antenatal attendance and to seek the views of users of antenatal care. In this study, the researchers combined studies from low- and middle-income countries (LMICs) that included women's views on antenatal care in a meta-synthesis of qualitative studies (qualitative research uses techniques, such as structured interviews, to gather an in-depth understanding of human behaviour, and a meta-synthesis combines and interprets information across studies, contexts, and populations).

**What Did the Researchers Do and Find?** The researchers searched several medical, sociological, and psychological databases to find appropriate qualitative studies published between January 1980 and February 2012 that explored the antenatal care experiences, attitudes, and beliefs of women from LMICs who had chosen to access antenatal care late (after 12 weeks' gestation), infrequently (less than four times), or not at all. The researchers included 21 studies (out of the 2,997 initially identified) in their synthesis, representing the views of 1,239 women from 15 countries (Bangladesh, Benin, Cambodia, Gambia, India, Indonesia, Kenya, Lebanon, Mexico, Mozambique, Nepal, Pakistan, South Africa, Tanzania, and Uganda) who were either interviewed directly or gave their opinion as part of a focus group. The researchers identified three main themes. The first theme reflects women's views that pregnancy is a healthy state and so saw little reason to visit health professionals when they perceived no risk to their well-being—the

researchers called this theme, "pregnancy as socially contingent and physiologically healthy." The second theme relates to women's limited financial resources, so that even when antenatal care was offered free of charge, the cost of transport to get there, the loss of earnings associated with the visit, and the possibility of having to pay for medicines meant that women were unable to attend—the researchers called this theme "resource use and survival in conditions of extreme poverty." The third theme the researchers identified related to women's views that the antenatal services were inadequate and that the benefits of attending did not outweigh any potential harms. For example, pregnant women who initially recognized the benefits of antenatal care were often disappointed by the lack of resources they found when they got there and, consequently, decided not to return. The researchers called this theme "not getting it right the first time."

**What Do These Findings Mean?** These findings suggest that there may be a misalignment between the principles that underpin the provision of antenatal care and the beliefs and socio-economic contexts of pregnant women in LMICs, meaning that even high-quality antenatal care may not be used by some pregnant women unless their views and concerns are addressed. The themes identified in this meta-synthesis could provide the basis for a new approach to the design and delivery of antenatal care that takes local beliefs and values and resource availability into account. Such programs might help ensure that antenatal care meets pregnant women's expectations and treats them appropriately so that they want to regularly attend antenatal care.

**Additional Information.** Please access these websites via the online version of this summary at <http://dx.doi.org/10.1371/journal.pmed.1001373>.

- Wikipedia describes antenatal care (note that Wikipedia is a free online encyclopedia that anyone can edit)
- The World Health Organization has a wealth of information relating to pregnancy, including antenatal care
- The UK National Institute for Health and Clinical Excellence has evidence-based guidelines on antenatal care
- The White Ribbon Alliance for Safe Motherhood has a series of web pages and links relating to respectful maternity care in LMICs
- International Federation of Gynecology and Obstetrics is an international organization with connections to various maternity initiatives in LMICs
- International Confederation of Midwives has details of the Millennium Development Goals relating to maternity care
